# Supplementary material for: Returning to dialysis after kidney allograft failure: the experience of the Italian Registry of Paediatric Chronic Dialysis
Source: Springer Nature journal article supplement (doi:10.1007/s00467-021-05140-6), 2021-06-14
Supplement: MOESM1 [file 19258202]

## Online supplementary material

### **Returning to Dialysis After Kidney Allograft Failure: The Experience of the Italian Registry of Paediatric Chronic Dialysis**

Journal: Pediatric Nephrology

Edoardo La Porta, Ester Conversano, Daniela Zugna, Roberta Camilla, Raffaella Labbadia, Fabio Paglialonga, Mattia Parolin, Enrico Vidal and Enrico Verrina, on behalf of the Italian Registry of Paediatric Chronic Dialysis

#### **Corresponding author:**

Enrico Vidal

Paediatric Nephrology Program

Division of Paediatrics – Department of Medicine (DAME)

University of Udine

P.le S.M della Misericordia, 15

33100 Udine – ITALY

Email: [enrico.vidal@inwind.it](mailto:enrico.vidal@inwind.it)

**Supplementary Table 1.** Hazard ratio with 95% confidence intervals for the risk of switching modality and transplantation estimated by multivariable Fine and Gray model (N=104).

|                                                  | Switching dialysis modality |                         | Transplantation |                         |
|--------------------------------------------------|-----------------------------|-------------------------|-----------------|-------------------------|
|                                                  | HR                          | 95% confidence interval | HR              | 95% confidence interval |
| <b>Dialysis post-transplant</b>                  |                             |                         |                 |                         |
| HD                                               | 1.00                        | ref                     | 1.00            | ref                     |
| PD                                               | 2.20                        | 0.38;12.54              | 0.59            | 0.26;1.34               |
| <b>Gender</b>                                    |                             |                         |                 |                         |
| Male                                             | 1.00                        | ref                     | 1.00            | ref                     |
| Female                                           | 1.87                        | 0.42;8.25               | 1.43            | 0.73;2.80               |
| <b>Primary kidney disease</b>                    |                             |                         |                 |                         |
| CAKUT                                            | 1.00                        | ref                     | 1.00            | ref                     |
| Glomerulonephritis                               | 2.27                        | 0.49;10.39              | 0.97            | 0.50;1.89               |
| HUS / Ischemic                                   | -                           | -                       | 1.76            | 0.35;8.85               |
| Miscellaneous                                    | 2.35                        | 0.31;17.84              | 1.55            | 0.66;3.65               |
| <b>Dialysis pre-transplant</b>                   |                             |                         |                 |                         |
| HD                                               | 1.00                        | ref                     | 1.00            | ref                     |
| PD                                               | 2.19                        | 0.29;16.51              | 1.03            | 0.48;2.24               |
| <b>Dialysis cycle</b>                            |                             |                         |                 |                         |
| 2                                                | 1.00                        | ref                     | 1.00            | ref                     |
| 3+                                               | 0.96                        | 0.14;6.56               | 1.25            | 0.55;2.84               |
| <b>Comorbidity</b>                               |                             |                         |                 |                         |
| No                                               | 1.00                        | ref                     | 1.00            | ref                     |
| Yes                                              | 0.47                        | 0.06;3.54               | 1.32            | 0.57;3.07               |
| <b>Pre-transplant dialysis duration (months)</b> |                             |                         |                 |                         |
| Unit increase                                    | 1.01                        | 0.99;1.03               | 0.98            | 0.96;1.00               |
| <b>Age at dialysis post-transplant</b>           |                             |                         |                 |                         |
| Unit increase                                    | 0.95                        | 0.82;1.11               | 0.98            | 0.91;1.05               |
| <b>Calendar year at dialysis post-transplant</b> |                             |                         |                 |                         |
| Unit increase                                    | 1.01                        | 0.92 ;1.11              | 1.01            | 0.96 ;1.05              |

**Supplementary table 2.** Frequencies of patients with dialysis-related complications in pre- and post-transplant period according to dialysis modality.

| Type of complication                             | PD                           |                               | HD                           |                               |
|--------------------------------------------------|------------------------------|-------------------------------|------------------------------|-------------------------------|
|                                                  | Pre-transplant course (n=74) | Post-transplant course (n=41) | Pre-transplant course (n=44) | Post-transplant course (n=77) |
| Peritonitis or dialysis access-related infection | 8 (47%)                      | 9 (45%)                       | 3 (75%)                      | 2 (14.4%)                     |
| Malfunctioning of dialysis access (mechanical)   | 1 (5.9%)                     | 1 (5%)                        | -                            | 5 (35.7%)                     |
| Inadequate dialysis efficiency                   | 2 (11.8%)                    | 8 (40%)                       | -                            | -                             |
| Hypertension/fluid overload                      | 3 (17.6%)                    | 2 (10%)                       | 1 (25%)                      | 5 (35.7%)                     |
| Hypotension                                      | 2 (11.8%)                    | -                             | -                            | 1 (7.1%)                      |
| Other                                            | 1 (5.9%)                     | -                             | -                            | -                             |
| Unknown                                          | -                            | -                             | -                            | 1 (7.1%)                      |
